# Supplementary material
Source: Springer Nature journal article supplement (https://www.springermedizin.de/resource/supplementary/12957_2013_1908_MOESM9_ESM.pdf/9563052)

Se: 2  
Im: 88+C  
XY 19.00 Ax  
DFOV 31.6cm  
STND

CT268787  
Jan 29 2009  
08:37:16 AM  
512 X 512

Mag = 1.11  
FL:  
ROT:

R  
1  
9  
3

L  
1  
2  
3

kV 120  
mA 340

Large  
5.000mm/27.50 1.375:1  
Tilt: 0.0

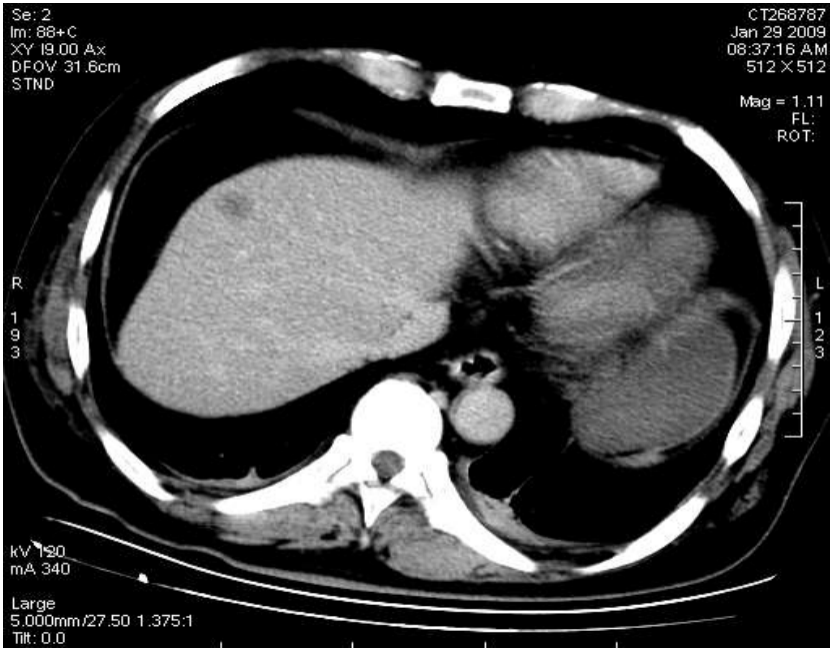

Supplement: MOESM9 [file 9563052]
